# Supplementary material for: Synthesis of eugenol-based multifunctional monomers via a thiol–ene reaction and preparation of UV curable resins together with soybean oil derivatives
Source: Royal Society of Chemistry journal article supplement (doi:10.1039/c6ra01420h), 2016-01-01
Supplement: c6ra01420h1.pdf [file c6ra01420h1.pdf]

## Supporting Information

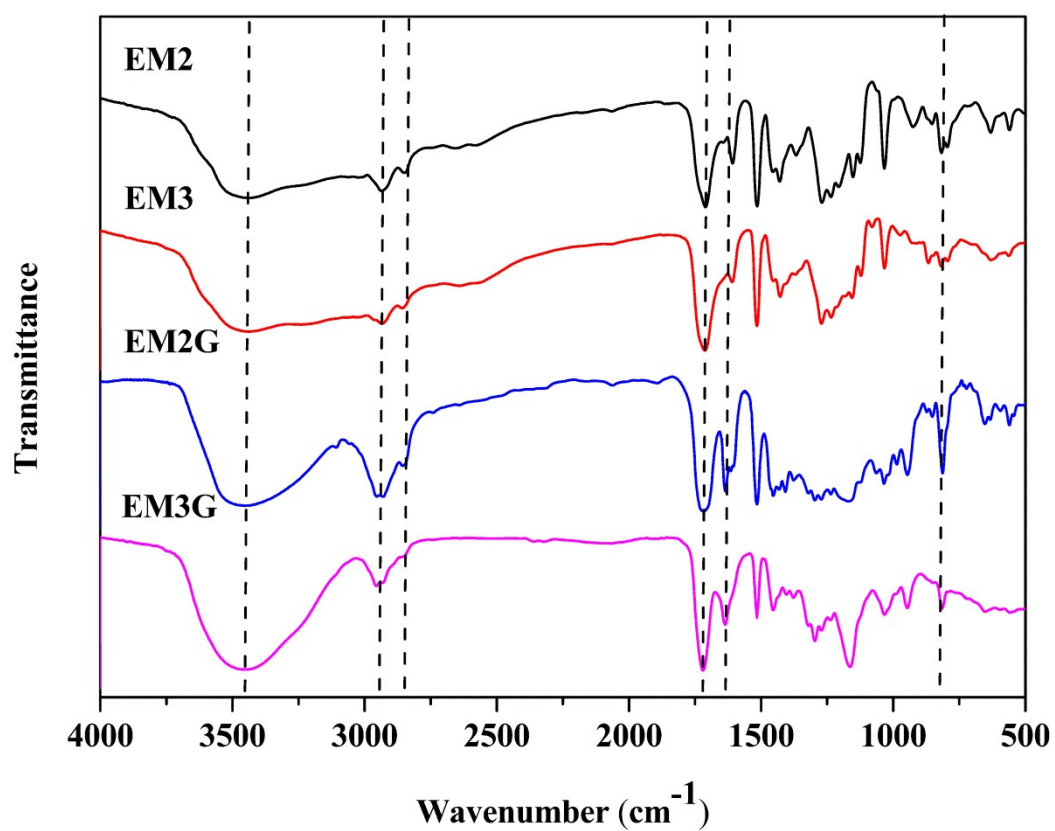

**Fig. 1** FT-IR spectra of EM2, EM3, EM2G and EM3G

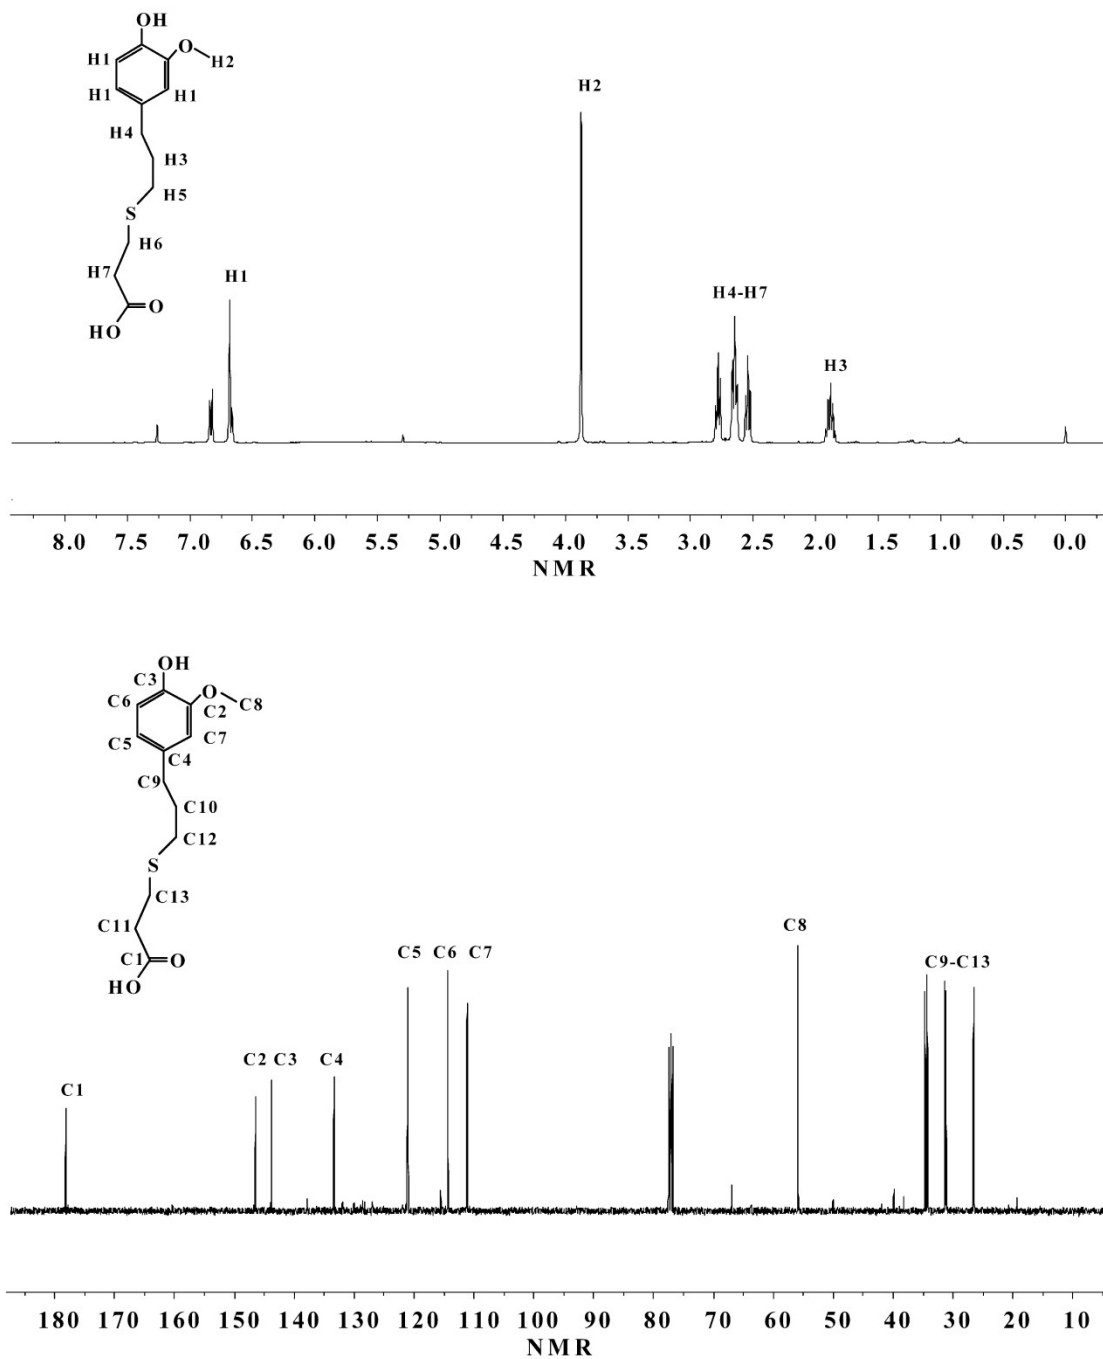

**Fig. 2** The  $^1\text{H}$  NMR and  $^{13}\text{C}$  NMR spectra of EM2.

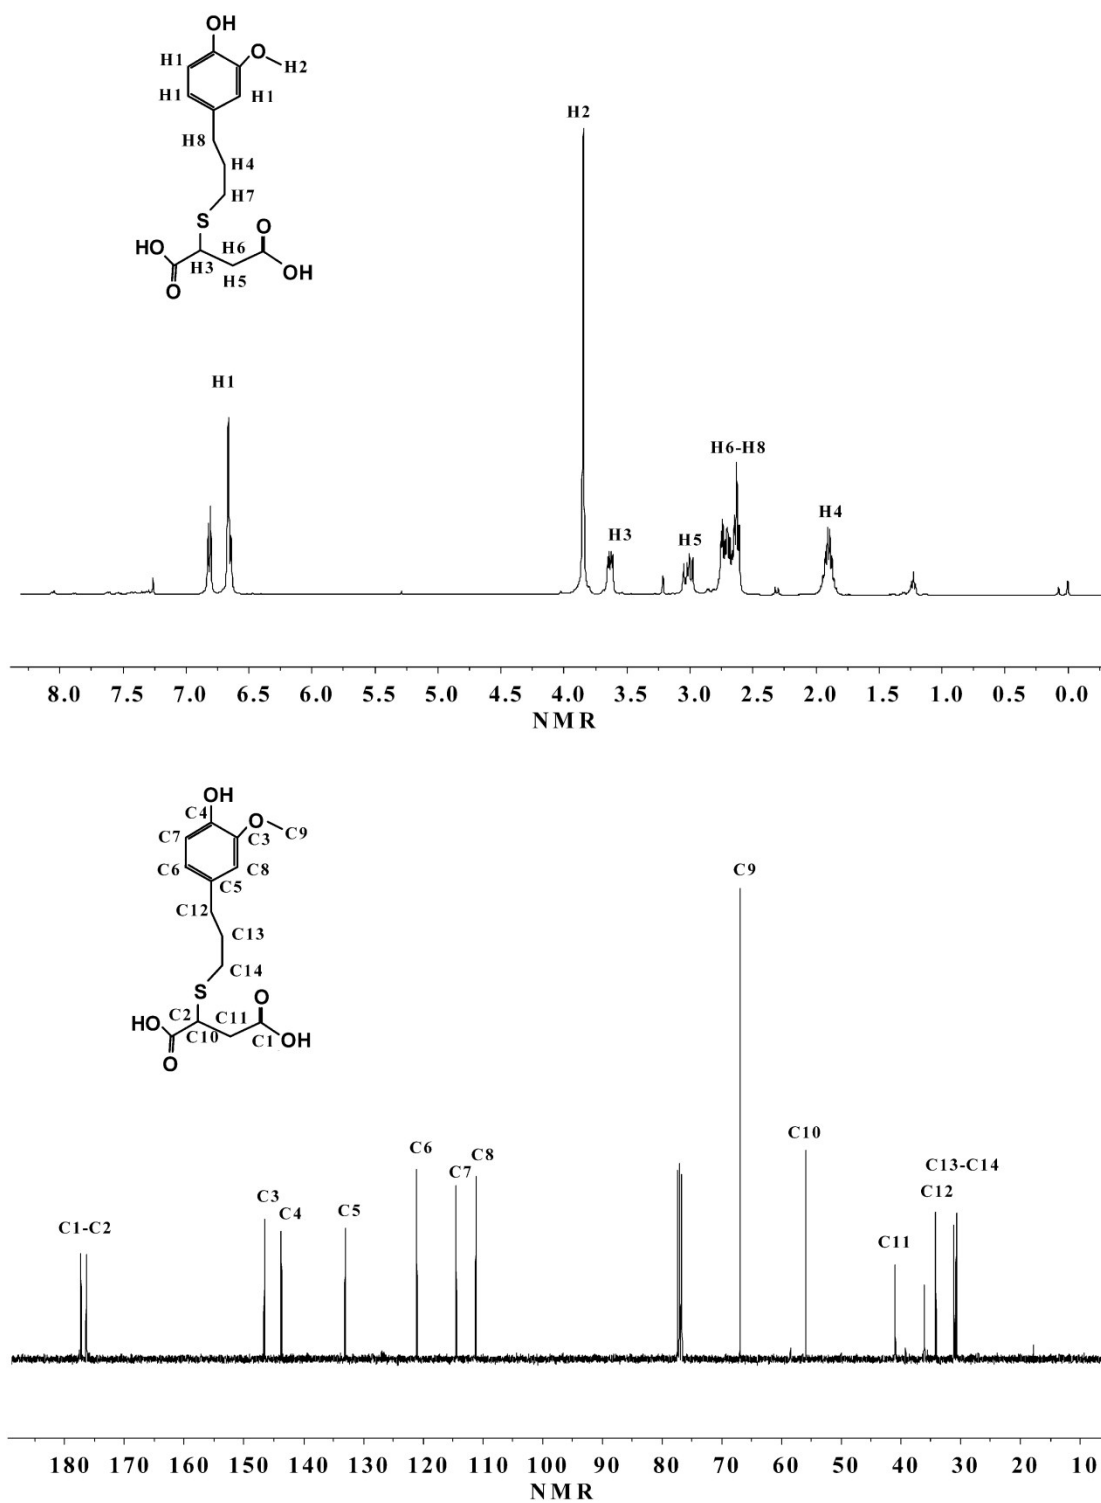

**Fig. 3** The  $^1\text{H}$  NMR and  $^{13}\text{C}$  NMR spectra of EM3.

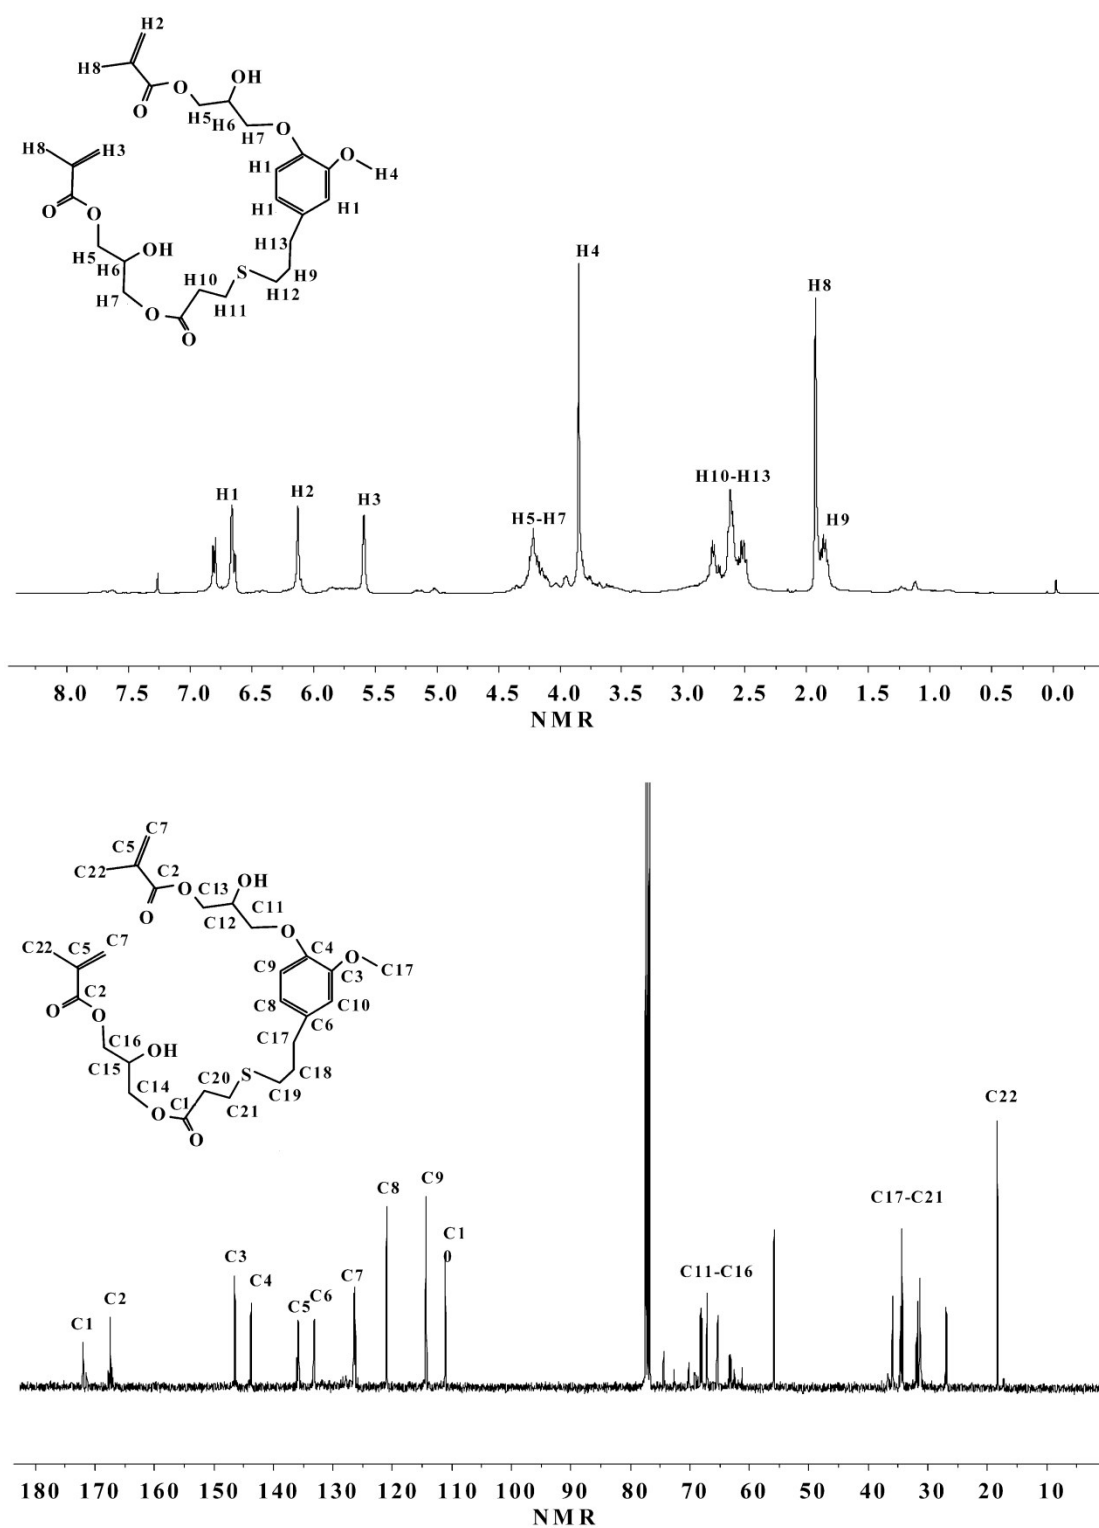

**Fig. 4** The  $^1\text{H}$  NMR and  $^{13}\text{C}$  NMR spectra of EM2G.

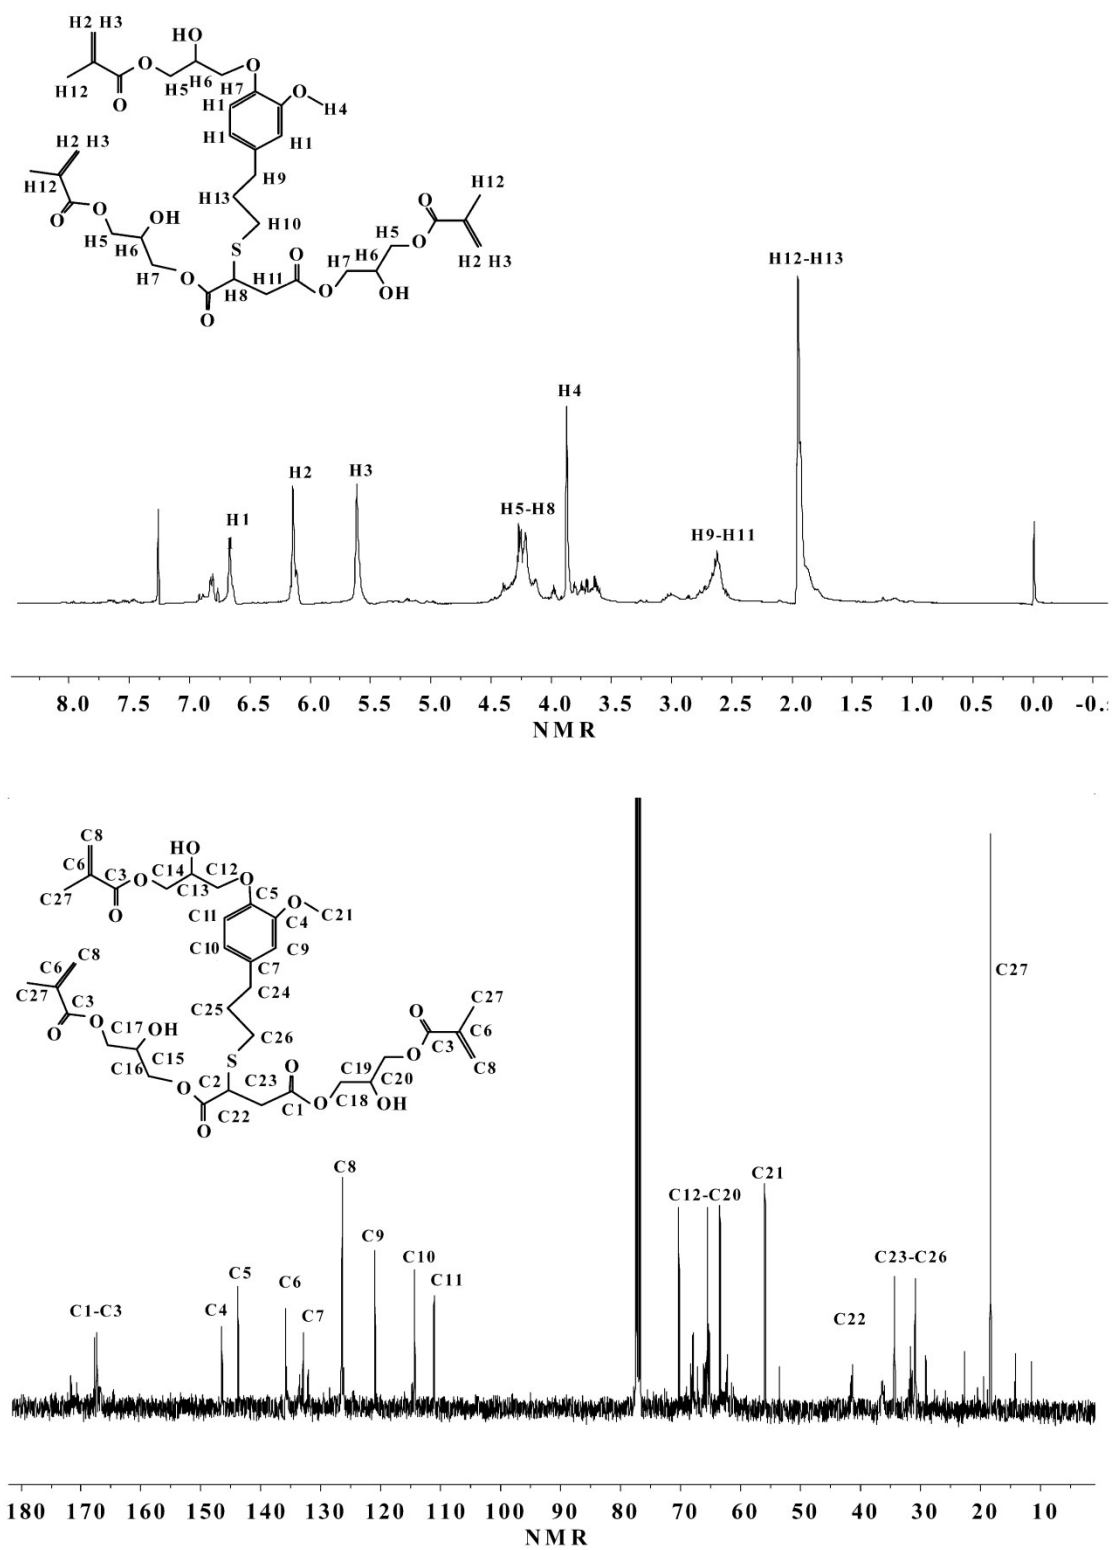

**Fig. 5** The  $^1\text{H}$  NMR and  $^{13}\text{C}$  NMR spectra of EM3G.
